# Supplementary material
Source: HighWire-hosted journal article supplement (https://www.annfammed.org/highwire/filestream/7768/field_highwire_adjunct_files/3/Jaen_SuppApp3.pdf)
Supplement: Jaen_SuppApp3.pdf [file Jaen_SuppApp3.pdf]

**Online Supplementary Material**

Jaén CR, Crabtree BF, Palmer R, et al. Methods for evaluating practice change toward a patient-centered medical home. *Ann Fam Med*. 2010;8(Suppl 1):S9-S20.

[http://www.annfammed.org/cgi/content/full/8/Suppl\\_1/S9/DC1](http://www.annfammed.org/cgi/content/full/8/Suppl_1/S9/DC1)

---

**Supplemental Appendix 3. Depression Measures**

The appendix begins on the next page.

Q73

Date of initial diagnosis for this episode of depression care if since {date\_2yrback}.

## Acute Phase Care (< 6 months ago)

Q74

Is there indication that depression diagnosis based on criteria (DSM-IV, PHQ-9, etc.)?

Yes .....

No .....

Q75

In the plan of care, was there recommended follow-up for depression or referral to mental health clinician?

Yes .....

No .....

## Continuation Phase Care (> 6 months but < 1 year ago)

Q76

Has regular follow-up (e.g. at least every 3 months) occurred either at practice or through referral?

Yes .....

No .....

Q77

If mental health referral, is there communication from them?

Yes .....

No .....

Q78

If follow-up visit occurred, was clinical course documented and/or care adjustment?

Yes .....

No .....

## Chronic Care (> 1 year ago)

Q79

Is there documentation in past year of actively addressing the diagnosis of depression?

Yes .....

No .....
